# Supplementary material for: Phosphine complexes of aluminium(iii) halides – preparation and structural and spectroscopic systematics
Source: Royal Society of Chemistry journal article supplement (doi:10.1039/c4dt02051k), 2014-08-08

ESI

for

## Phosphine Complexes of Aluminium(III) Halides – Preparation and Structural and Spectroscopic Systematics

Jennifer Burt, William Levason, Mark E. Light and Gillian Reid

School of Chemistry, University of Southampton, Southampton SO171BJ, UK; email:

[wxl@soton.ac.uk](mailto:wxl@soton.ac.uk)

**Table S1.** X-ray crystallographic data

| Compound                                                                                 | $[o\text{-C}_6\text{H}_4(\text{PMe}_2)(\text{PHMe}_2)]_2$<br>[AlCl <sub>4</sub> ][Cl] | $[o\text{-C}_6\text{H}_4(\text{PMe}_2)(\text{PHMe}_2)]_2$<br>[AlBr <sub>4</sub> ][Br] | [Cy <sub>2</sub> HP(CH <sub>2</sub> ) <sub>2</sub> PHCy <sub>2</sub> ]<br>[AlCl <sub>4</sub> ] <sub>2</sub> |
|------------------------------------------------------------------------------------------|---------------------------------------------------------------------------------------|---------------------------------------------------------------------------------------|-------------------------------------------------------------------------------------------------------------|
| Formula                                                                                  | C <sub>20</sub> H <sub>34</sub> AlCl <sub>5</sub> P <sub>4</sub>                      | C <sub>20</sub> H <sub>34</sub> AlBr <sub>5</sub> P <sub>4</sub>                      | C <sub>26</sub> H <sub>50</sub> Al <sub>2</sub> Cl <sub>8</sub> P <sub>2</sub>                              |
| <i>M</i>                                                                                 | 602.58                                                                                | 824.88                                                                                | 762.16                                                                                                      |
| Crystal system                                                                           | monoclinic                                                                            | monoclinic                                                                            | monoclinic                                                                                                  |
| Space group                                                                              | C2/c (no. 15)                                                                         | C2/c (no. 15)                                                                         | P2 <sub>1</sub> /c (no. 14)                                                                                 |
| <i>a</i> /Å                                                                              | 14.599(5)                                                                             | 14.834(7)                                                                             | 7.073(6)                                                                                                    |
| <i>b</i> /Å                                                                              | 20.672(7)                                                                             | 21.144(8)                                                                             | 17.551(13)                                                                                                  |
| <i>c</i> /Å                                                                              | 11.006(5)                                                                             | 11.274(5)                                                                             | 14.924(13)                                                                                                  |
| $\alpha$ /°                                                                              | 90                                                                                    | 90                                                                                    | 90                                                                                                          |
| $\beta$ /°                                                                               | 115.061(5)                                                                            | 115.646(6)                                                                            | 101.682(15)                                                                                                 |
| $\gamma$ /°                                                                              | 90                                                                                    | 90                                                                                    | 90                                                                                                          |
| <i>U</i> /Å <sup>3</sup>                                                                 | 3009(2)                                                                               | 3188(2)                                                                               | 1814(3)                                                                                                     |
| <i>Z</i>                                                                                 | 4                                                                                     | 4                                                                                     | 2                                                                                                           |
| $\mu$ (Mo-K $\alpha$ )/mm <sup>-1</sup>                                                  | 0.733                                                                                 | 6.540                                                                                 | 0.775                                                                                                       |
| <i>F</i> (000)                                                                           | 1248                                                                                  | 1608                                                                                  | 796                                                                                                         |
| Total number reflns                                                                      | 18200                                                                                 | 13640                                                                                 | 10205                                                                                                       |
| Unique reflns                                                                            | 3461                                                                                  | 3631                                                                                  | 3545                                                                                                        |
| <i>R</i> <sub>int</sub>                                                                  | 0.0930                                                                                | 0.0306                                                                                | 0.0741                                                                                                      |
| No. of params,<br>restraints                                                             | 146, 0                                                                                | 146, 0                                                                                | 175, 0                                                                                                      |
| <i>R</i> <sub>1</sub> , <i>wR</i> <sub>2</sub> [ <i>I</i> > 2σ( <i>I</i> )] <sup>b</sup> | 0.0640, 0.1041                                                                        | 0.0321, 0.0536                                                                        | 0.0884, 0.1658                                                                                              |
| <i>R</i> <sub>1</sub> , <i>wR</i> <sub>2</sub> (all data)                                | 0.0859, 0.1111                                                                        | 0.0382, 0.0555                                                                        | 0.1146, 0.1786                                                                                              |

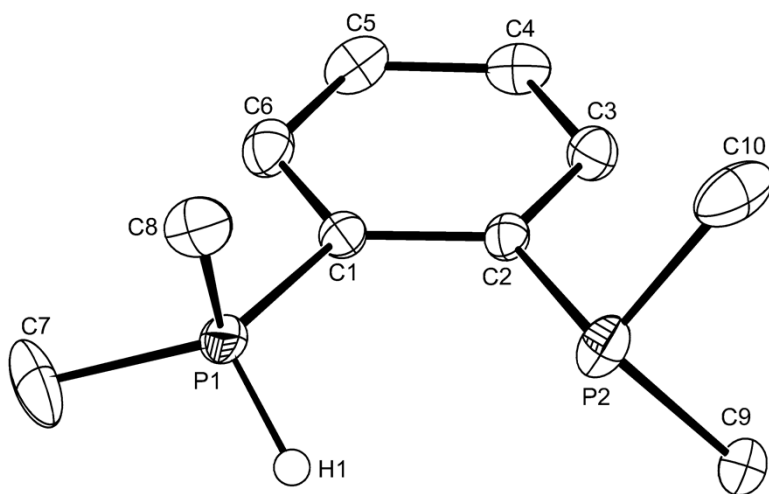

**Fig. S1.** The structure of the cation in  $[o\text{-C}_6\text{H}_4(\text{PMe}_2)(\text{PHMe}_2)]_2[\text{AlCl}_4][\text{Cl}]$  showing the atom labelling scheme. Ellipsoids are drawn at the 50% probability level and H atoms bonded to C are omitted for clarity. Selected bond lengths ( $\text{\AA}$ ): P1—C7 = 1.777(4), P1—C8 = 1.783(3), P1—C1 = 1.799(3), P1—H1 = 1.29(3), P2—C10 = 1.836(4), P2—C9 = 1.838(3), P2—C2 = 1.845(3). The cation in the isomorphous  $[o\text{-C}_6\text{H}_4(\text{PMe}_2)(\text{PHMe}_2)]_2[\text{AlBr}_4][\text{Br}]$  has effectively identical dimensions.

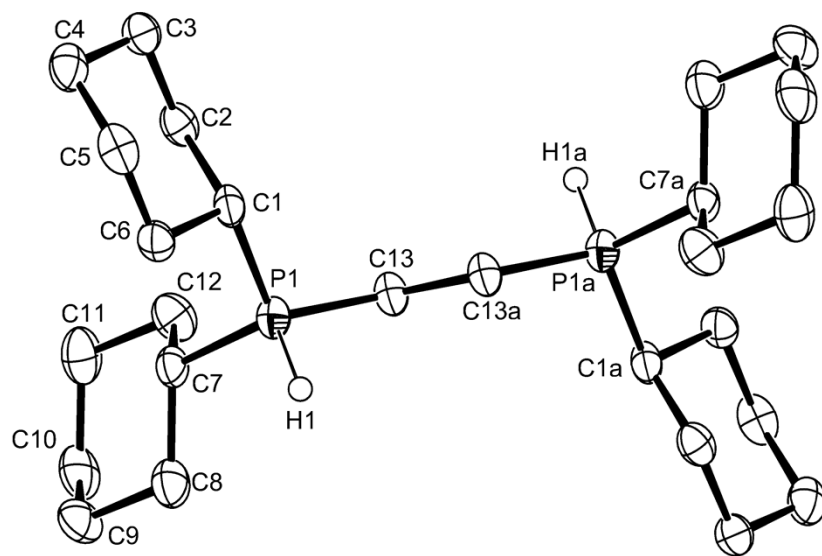

**Fig. S2.** The structure of the centrosymmetric cation in  $[\text{Cy}_2\text{HP}(\text{CH}_2)_2\text{PHCy}_2][\text{AlCl}_4]_2$  showing the atom labelling scheme. Ellipsoids are drawn at the 50% probability level and H atoms bonded to C are omitted for clarity. Symmetry operation:  $a = 1 - x, 1 - y, 2 - z$ . Selected bond lengths ( $\text{\AA}$ ): P1—C13 = 1.811(6), P1—C1 = 1.812(6), P1—C7 = 1.822(6), P1—H1 = 1.36(6).

These phosphonium salts were formed either by trace hydrolysis or as by-products (through reaction with the solvent) of the reactions of the diphosphanes with  $\text{AlX}_3$  as described in the main text. The spectroscopic data are listed below:-

$[\text{Cy}_2\text{HP}(\text{CH}_2)_2\text{PHCy}_2][\text{AlCl}_4]_2$ :  $^{31}\text{P}$  NMR ( $\text{CD}_2\text{Cl}_2$ , 295 K):  $\delta = 26.8$  (d,  $^1J_{\text{PH}} = 462$  Hz).

$[\text{o-C}_6\text{H}_4(\text{PMe}_2)(\text{PHMe}_2)]_2[\text{AlCl}_4][\text{Cl}]$ :  $^{31}\text{P}\{^1\text{H}\}$  NMR ( $\text{CD}_2\text{Cl}_2$ , 295 K):  $\delta = -4.2$  (d,  $^4J_{\text{PP}} = 56$  Hz),  $-51.9$  (d,  $^4J_{\text{PP}} = 56$  Hz).  $^{31}\text{P}$  NMR:  $\delta = -4.2$  (d,  $^1J_{\text{PH}} = 540$  Hz).

**Analysis of M–X Bond Lengths in  $[\text{MX}_4]^-$  (M = Al, Ga, I):** Data taken from the Cambridge Structural Database (CSD version 5.34; latest update = May 2013) on the 21<sup>st</sup> January 2014. The data were analysed in Legacy Vista (version 2.1). The REFCodes used all contained discrete  $[\text{MX}_4]^-$  molecules – those containing bonds to other atoms and structures containing any disorder were omitted.

**Figure S3.** Al–Cl Bond Length Distribution in  $[\text{AlCl}_4]^-$

Data points = 915 from 184 REFCodes

Range = 2.055 – 2.216 Å

Mean Al–Cl bond length =  $2.126 \pm 0.018$  Å

Al-Cl Bond Length Distribution in  $[\text{AlCl}_4]^-$

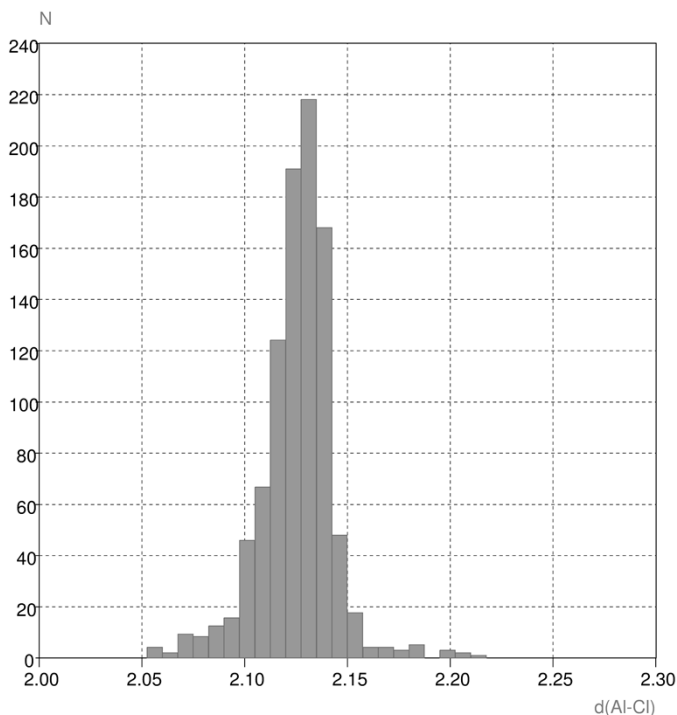

**Figure S4.** Al–Br Bond Length Distribution in  $[\text{AlBr}_4]^-$

Data points = 64 from 13 REFcodes

Range = 2.244 – 2.320 Å

Mean Al–Br bond length =  $2.289 \pm 0.015$  Å

Al-Br Bond Length Distribution in AlBr4-

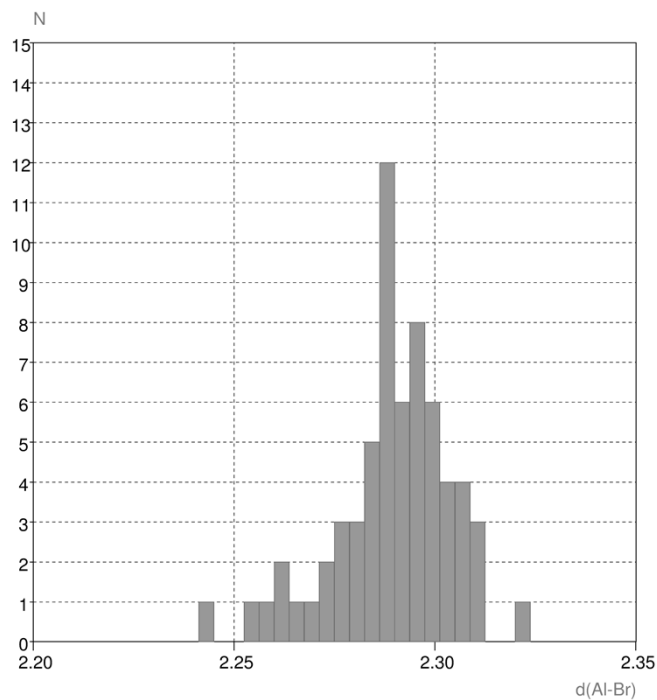

**Figure S5.** Al–I Bond Length Distribution in  $[\text{AlI}_4]^-$

Data points = 12 from 3 REFcodes

Range = 2.506 – 2.555 Å

Mean Al–I bond length =  $2.527 \pm 0.012$  Å

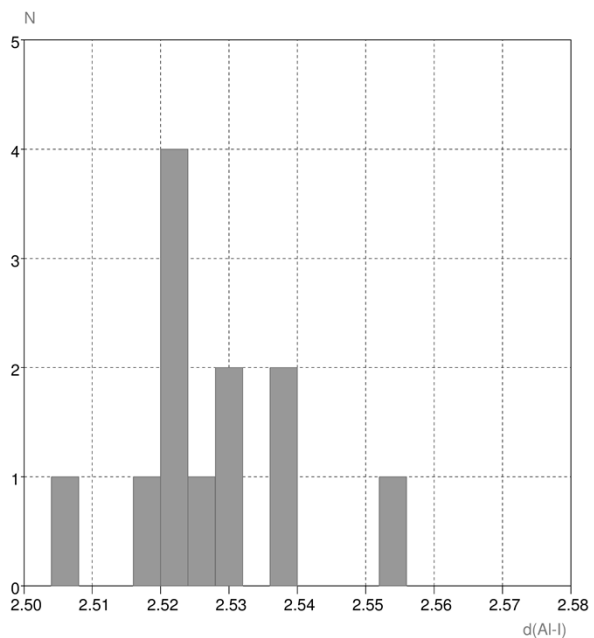

**Figure S6.** Ga-Cl Bond Length Distribution in  $[\text{GaCl}_4]^-$

Data points = 705 from 157 REFcodes

Range = 2.036 – 2.258 Å

Mean Ga-Cl bond length =  $2.166 \pm 0.018$  Å

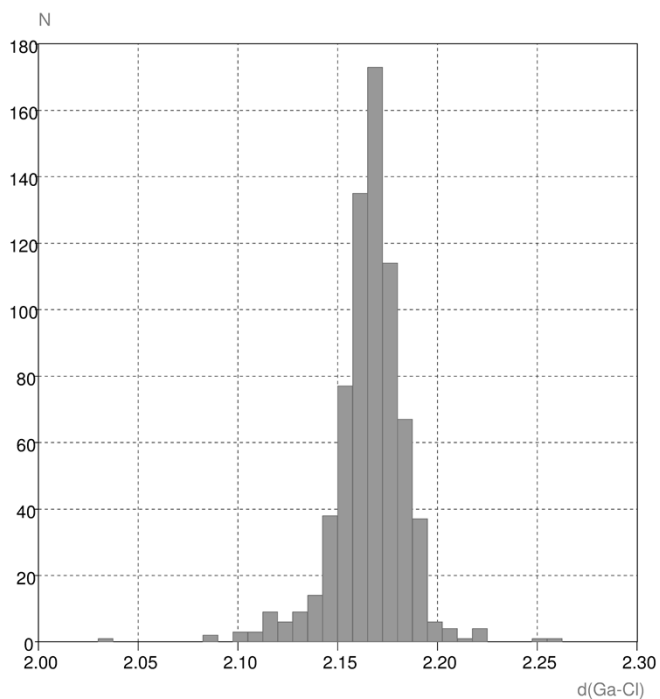

**Figure S7.** Ga–Br Bond Length Distribution in  $[\text{GaBr}_4]^-$

Data points = 91 from 27 REFCodes

Range = 2.277 – 2.361 Å

Mean Ga–Br bond length =  $2.321 \pm 0.016$  Å

Ga-Br Bond Length Distribution in GaBr4-

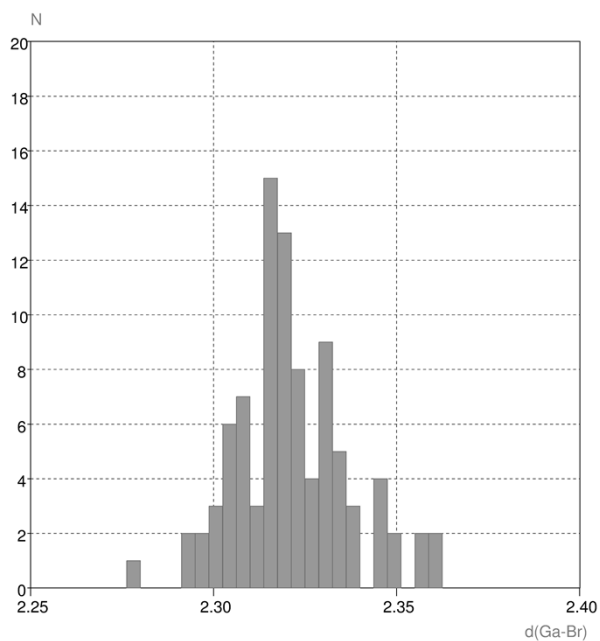

**Figure S8.** Ga–I Bond Length Distribution in  $[\text{GaI}_4]^-$

Data points = 31 from 8 REFCodes

Range = 2.506 – 2.586 Å

Mean Ga–I bond length =  $2.544 \pm 0.018$  Å

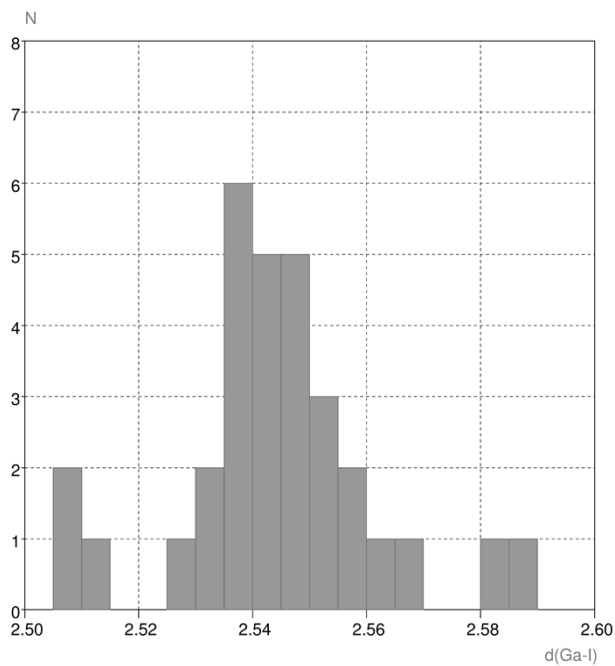

**Figure S9.** In-Cl Bond Length Distribution in  $[\text{InCl}_4]^-$

Data points = 26 from 7 REFcodes

Range = 2.295 – 2.368 Å

Mean In-Cl bond length =  $2.337 \pm 0.022$  Å

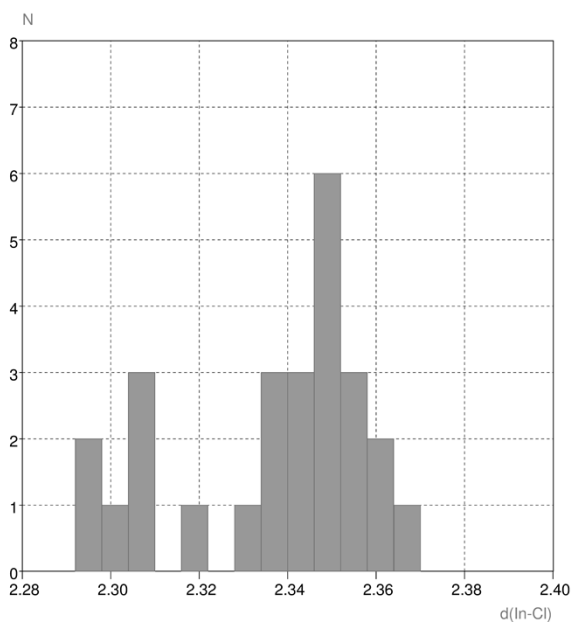

**Figure S10.** In–Br Bond Length Distribution in  $[\text{InBr}_4]^-$

Data points = 50 from 11 REFcodes

Range = 2.438 – 2.510 Å

Mean In–Br bond length =  $2.484 \pm 0.018$  Å

In-Br Bond Length Distribution for InBr4-

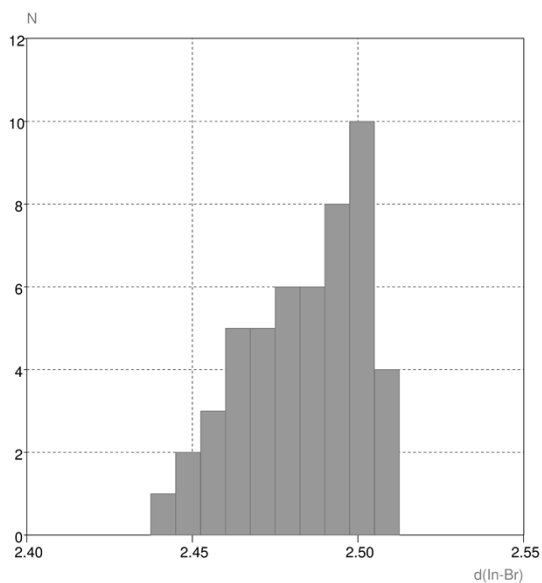

**Figure S11.** In–I Bond Length Distribution in  $[\text{InI}_4]^-$

Data points = 35 from 8 REFcodes

Range = 2.663 – 2.731 Å

Mean In–I bond length =  $2.702 \pm 0.014$  Å



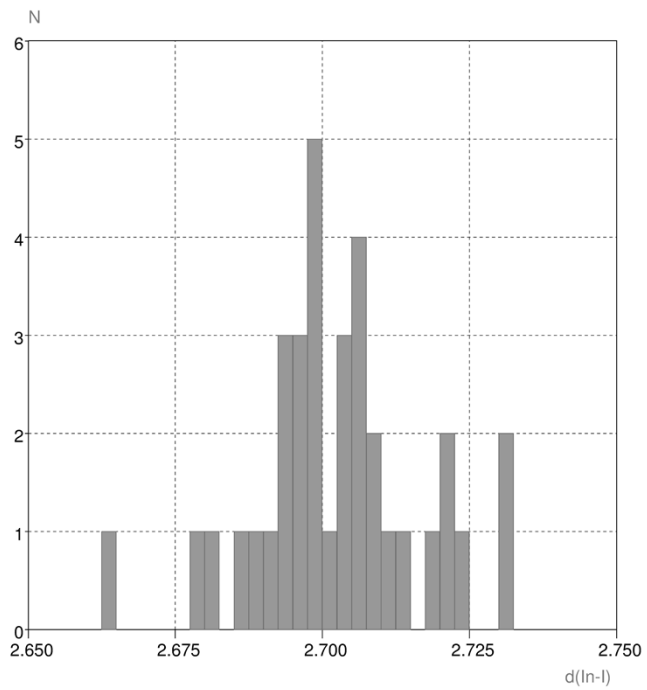

Supplement: c4dt02051k1.pdf [file c4dt02051k1.pdf]
